# Supplementary material for: Ecological factors and morphological traits are associated with repeated genomic differentiation between lake and stream stickleback
Source: PubMed Central journal article supplement (PMC6560272; doi:10.1098/rstb.2018.0241), 2019-06-03

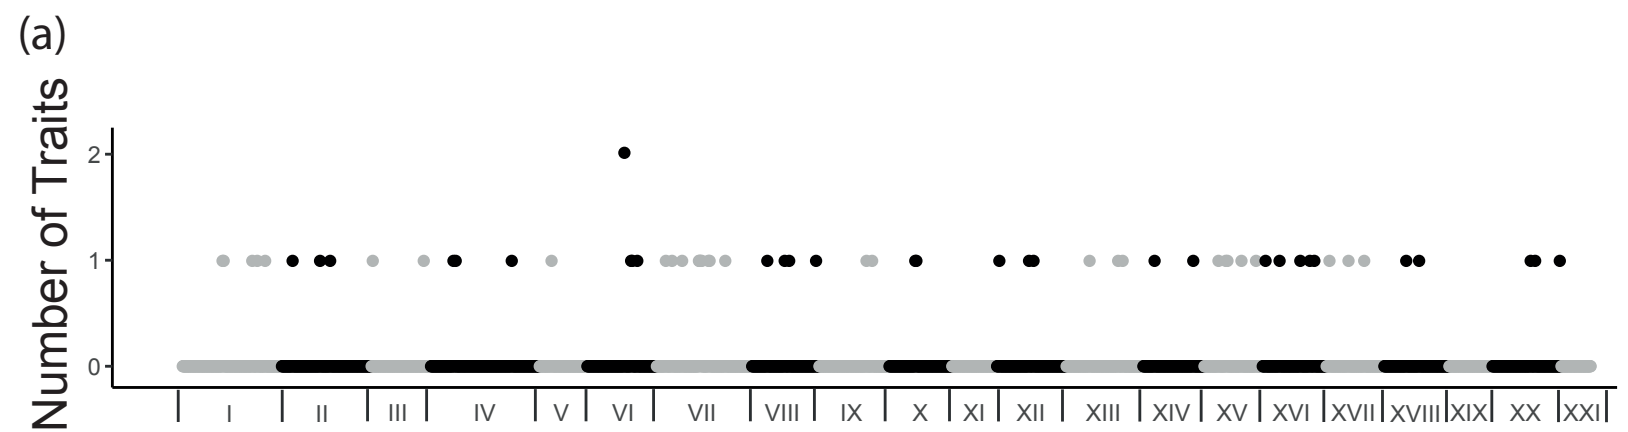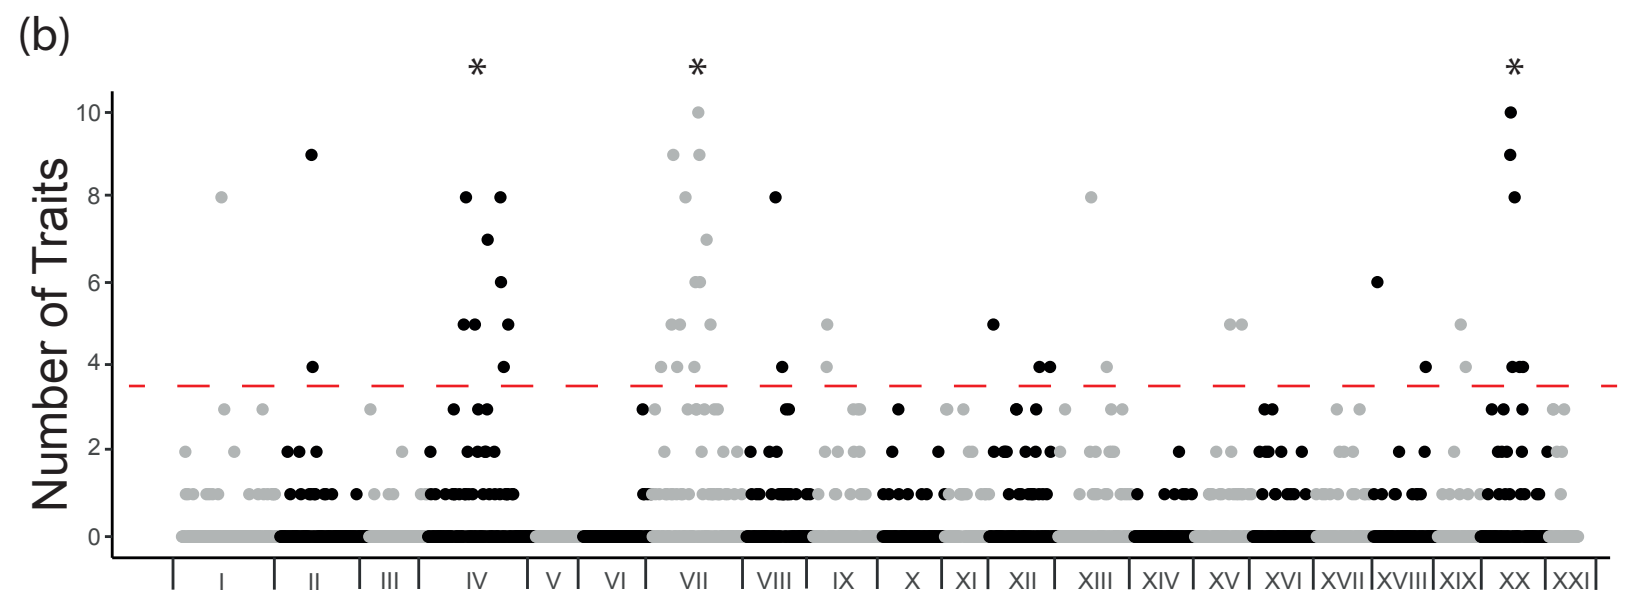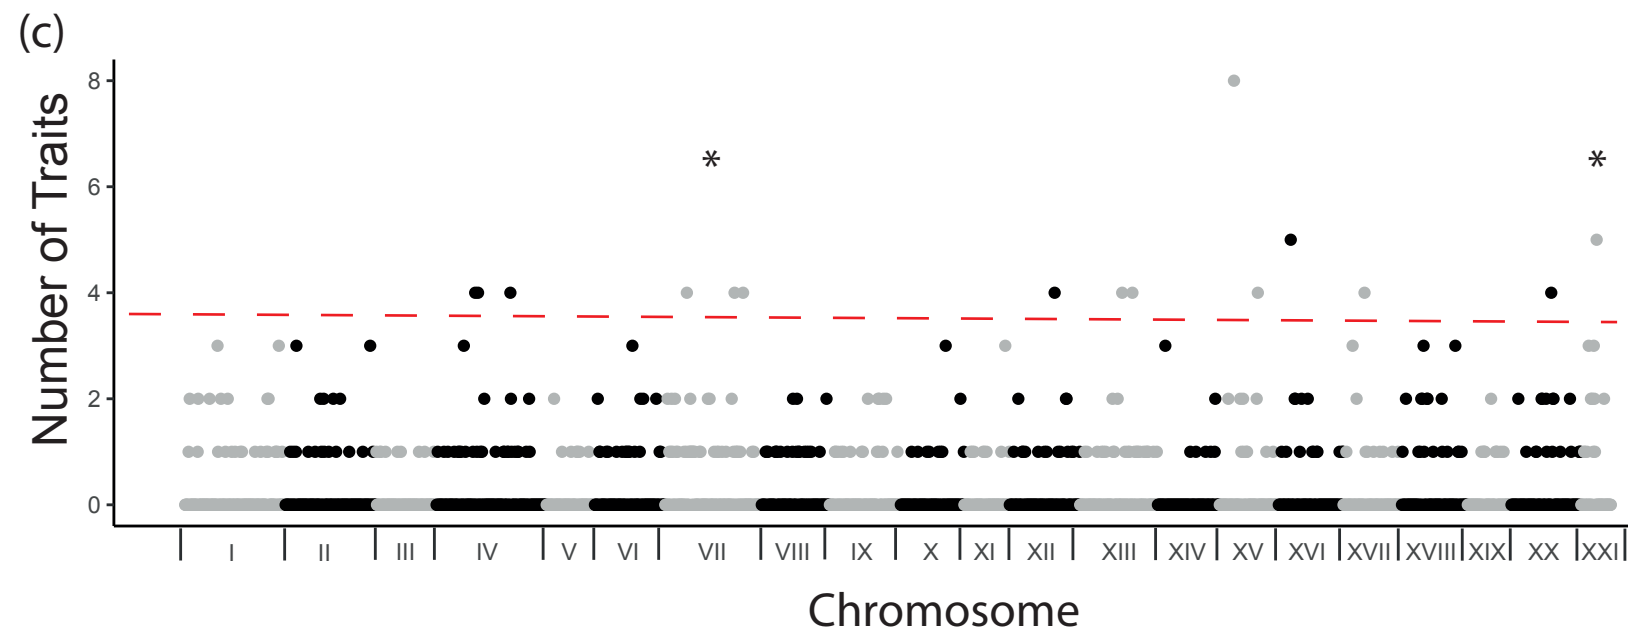

Supplement: rstb20180241supp5.pdf [file rstb20180241supp5.pdf]
